# Supplementary material for: Synergistic amplification of catalytic hydrogen generation by a thin-film conducting polymer composite
Source: Royal Society of Chemistry journal article supplement (doi:10.1039/c8cy00780b), 2018-01-01

## SUPPLEMENTARY MATERIAL

### Synergistic Amplification of Catalytic Hydrogen Generation by a Thin-Film Conducting Polymer Composite

Mohammed Alsultan, Jaecheol Choi, Rouhollah Jalili, Pawel Wagner and Gerhard F. Swiegers\*

**FIGURE S1:** Images of the sealed cell used in the gas analysis studies

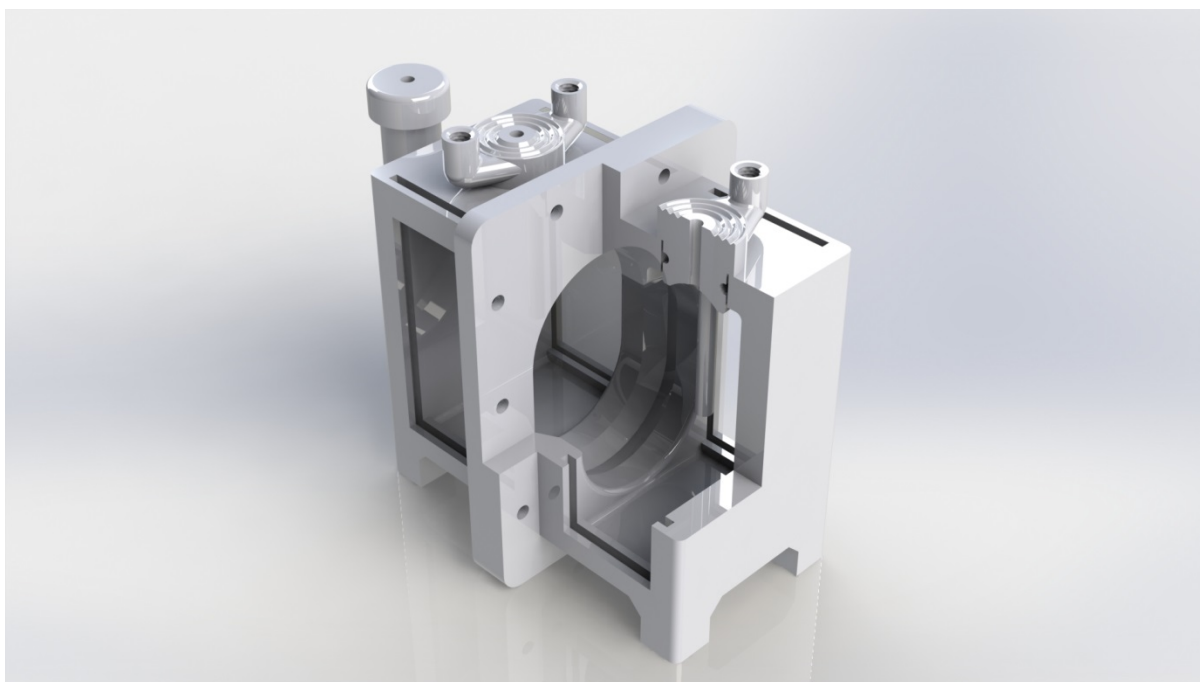

Partially cut-away view (computer-generated) showing the two half-cells

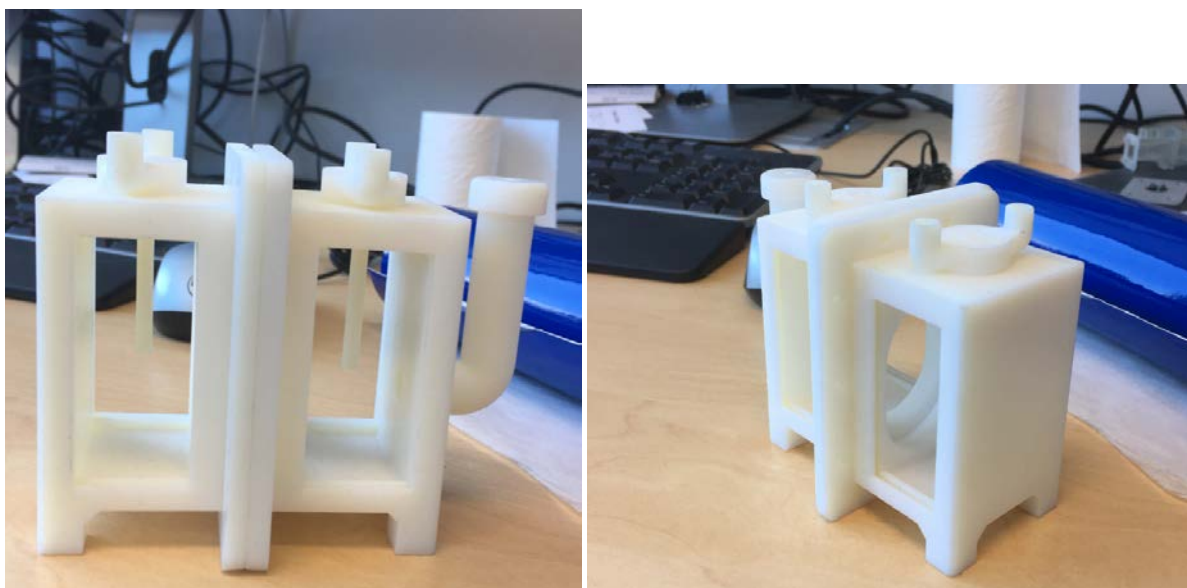

Photographs of the cell prior to being fitted with quartz windows

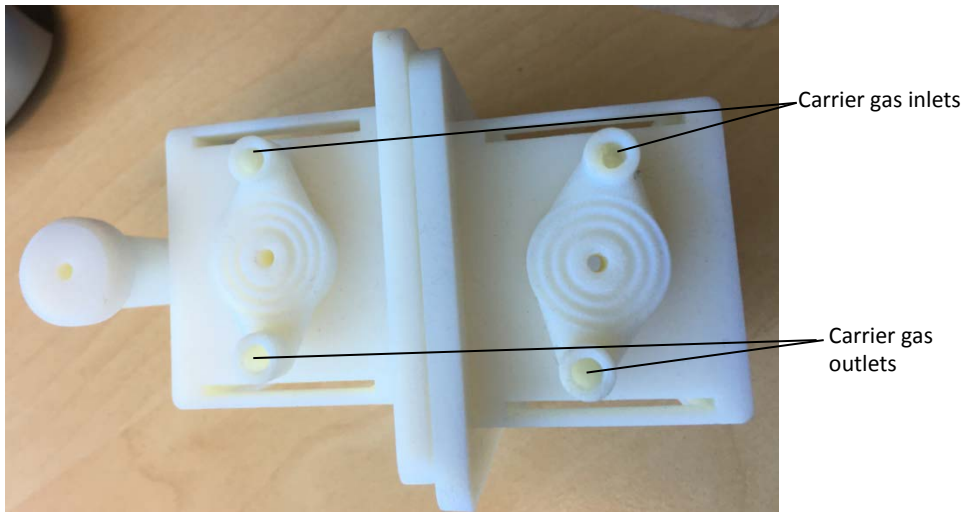

Photographs of the top-view of the cell prior to being fitted with quartz windows

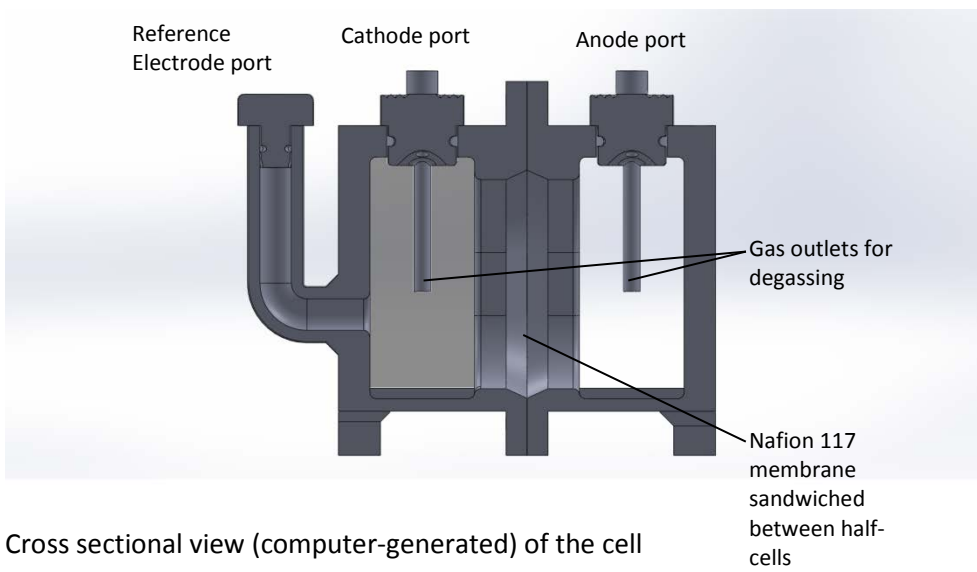

Cross sectional view (computer-generated) of the cell

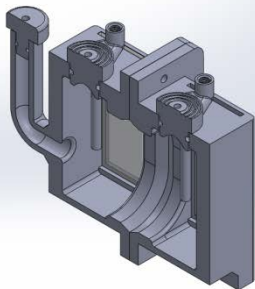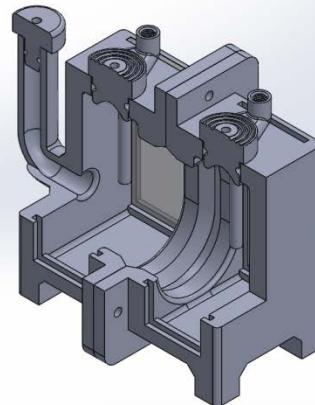

Cutaway, cross-sectional view (computer generated) of the cell

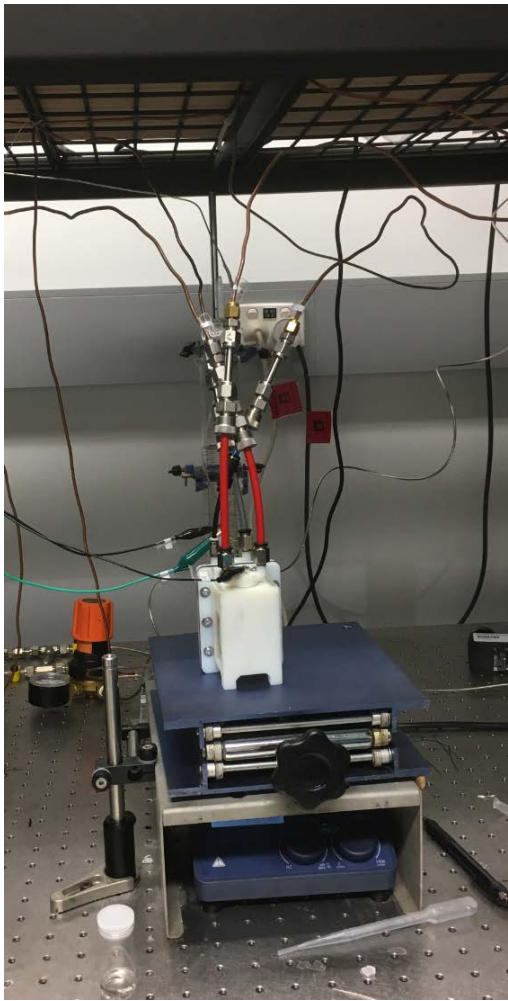

Cell in operation

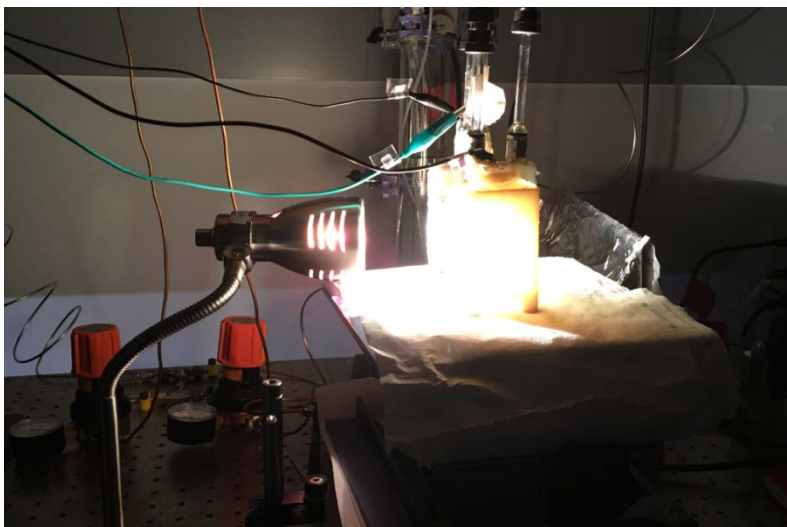

FIGURE S2: Pourbaix diagram for Ni

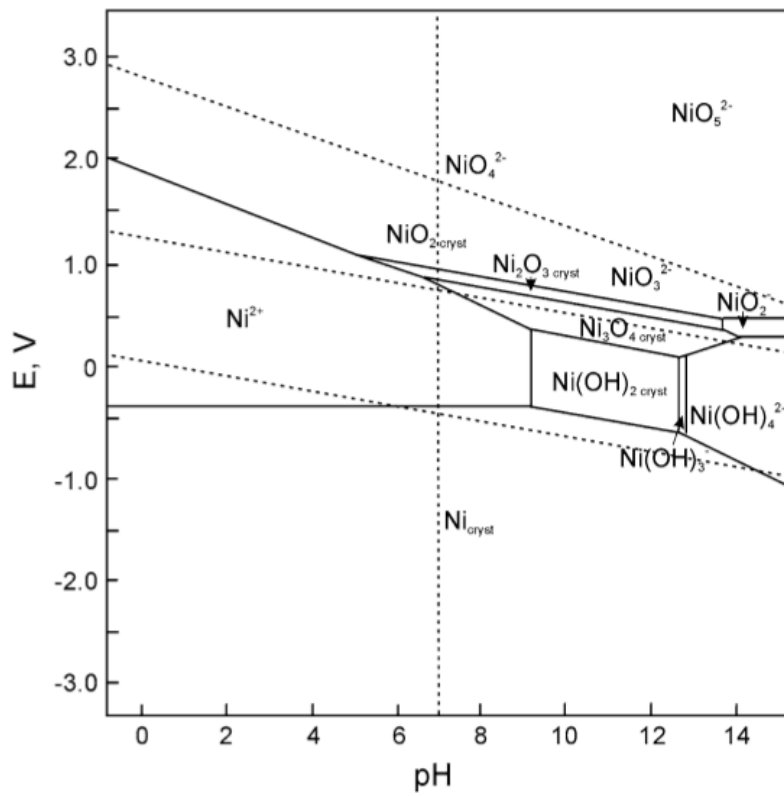

FIGURE S3: Gas chromatography trace of the gas collected

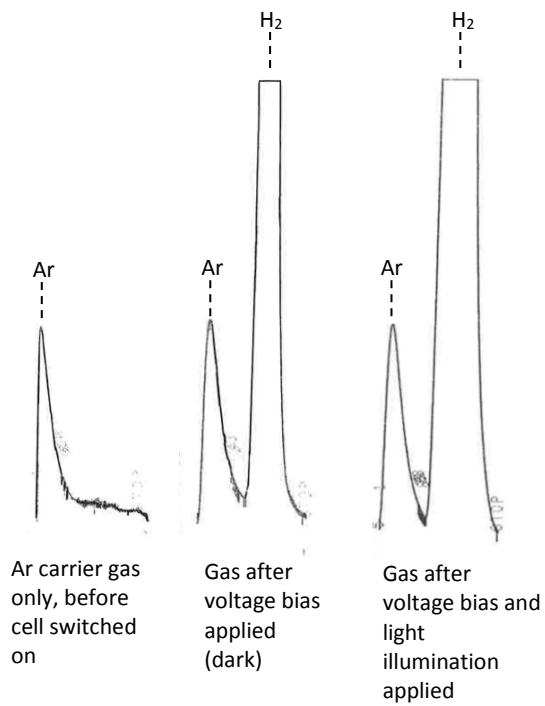

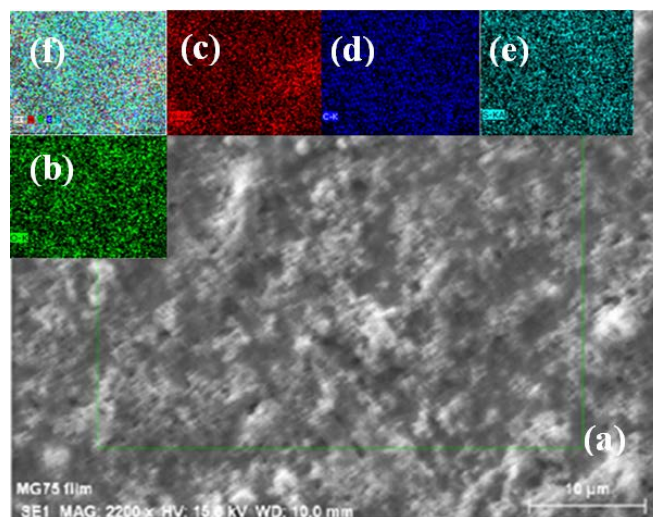

**FIGURE S4:** Scanning electron microscope (SEM) image of the most active PEDOT/Nano-Ni/rGO after preparation and prior to catalytic reaction. The inset images show the elemental distributions, using EDX, of: (b) O, (c) Ni, (d) C, (e) S, and (f) O, Ni, C, S together.

**FIGURE S5:** Visible absorbance of GO and rGO after being reduced electrochemically via cyclic voltammetry in range 0.8 to 1.2 V vs Ag/AgCl in Na<sub>2</sub>SO<sub>4</sub>; scan rate 50 V/s (8 cycles ). Inset: the GO film before (left) and after (right) reduction

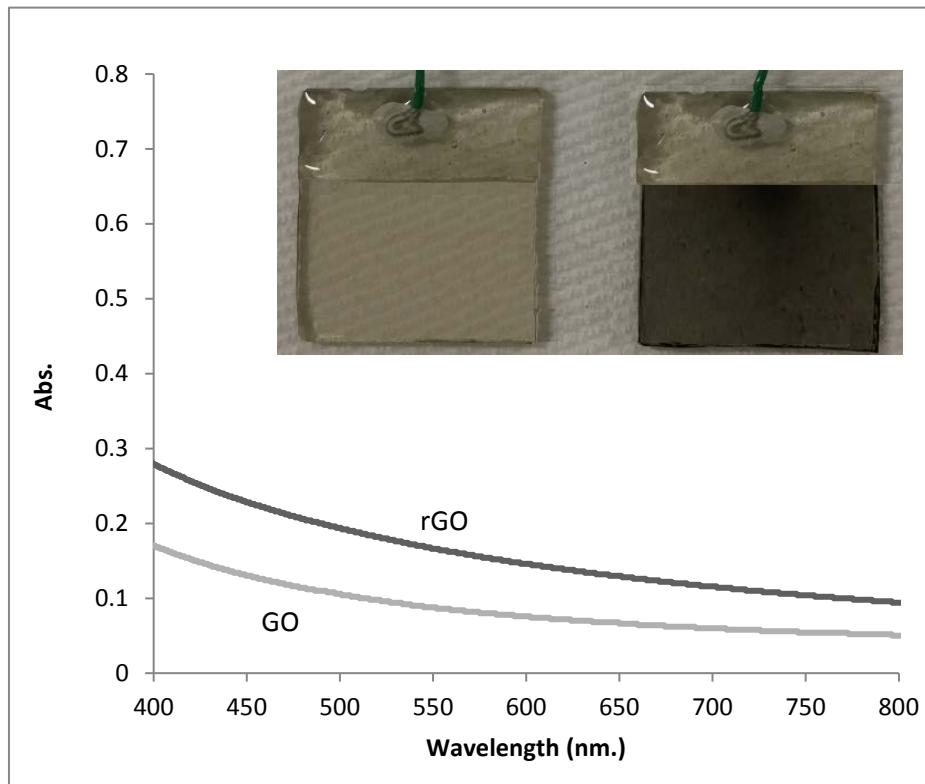

**FIGURE S6:** Visible absorbance of (i) PEDOT; (ii) rGO; (iii) (PEDOT/rGO); (iv) PEDOT/nano-Ni/rGO

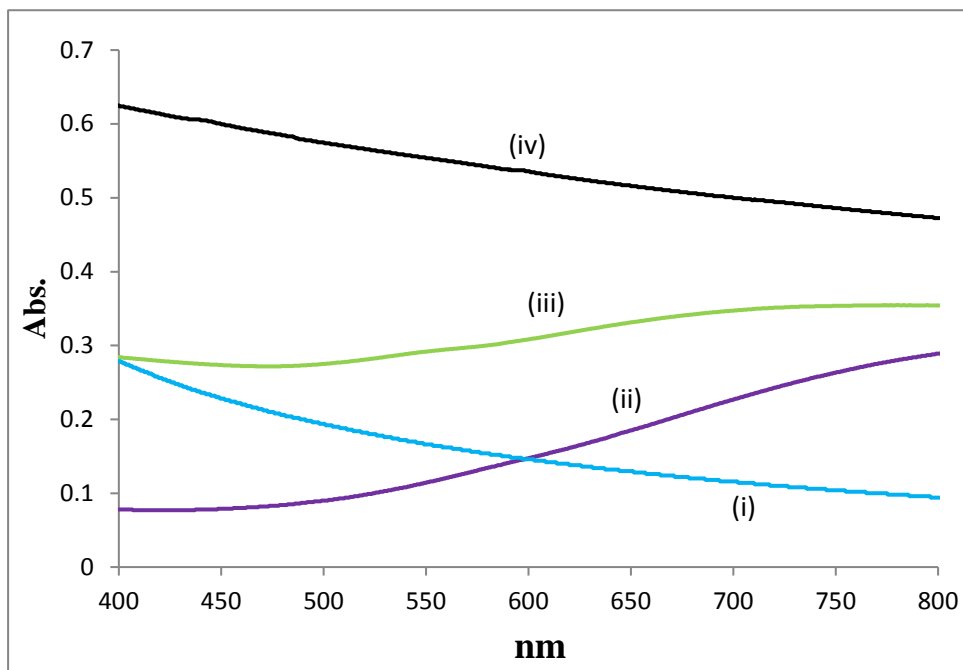

Supplement: c8cy00780b1.pdf [file c8cy00780b1.pdf]
